# Supplementary material
Source: MDPI journal article supplement (https://www.mdpi.com/2072-4292/14/10/2320)
Supplement: s1 [file s1 › remotesensing-1658590-supplementary.pdf]

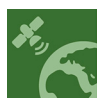

## Supplementary material

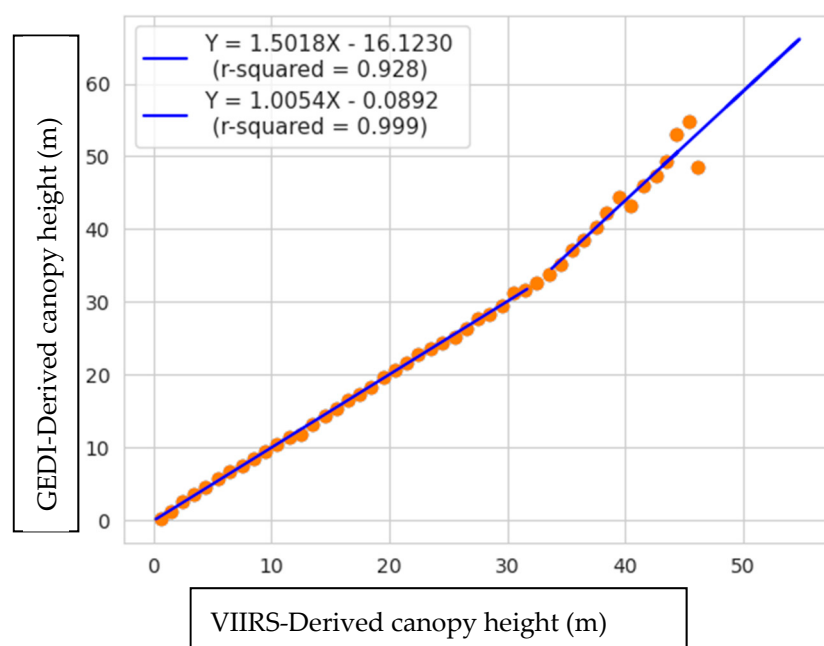

Figure S1. Scatter plot between average GEDI and VIIRS-derived canopy height values. The average values were calculated for binned data at a 1-m interval. The scatter plot of mean CH values revealed a piece-wise relationship with: (1) a near perfect 1:1 relationship for CH values < 33 m; and (2) a linear underestimation of GEDI mean CH for CH values  $\geq 33$  m.

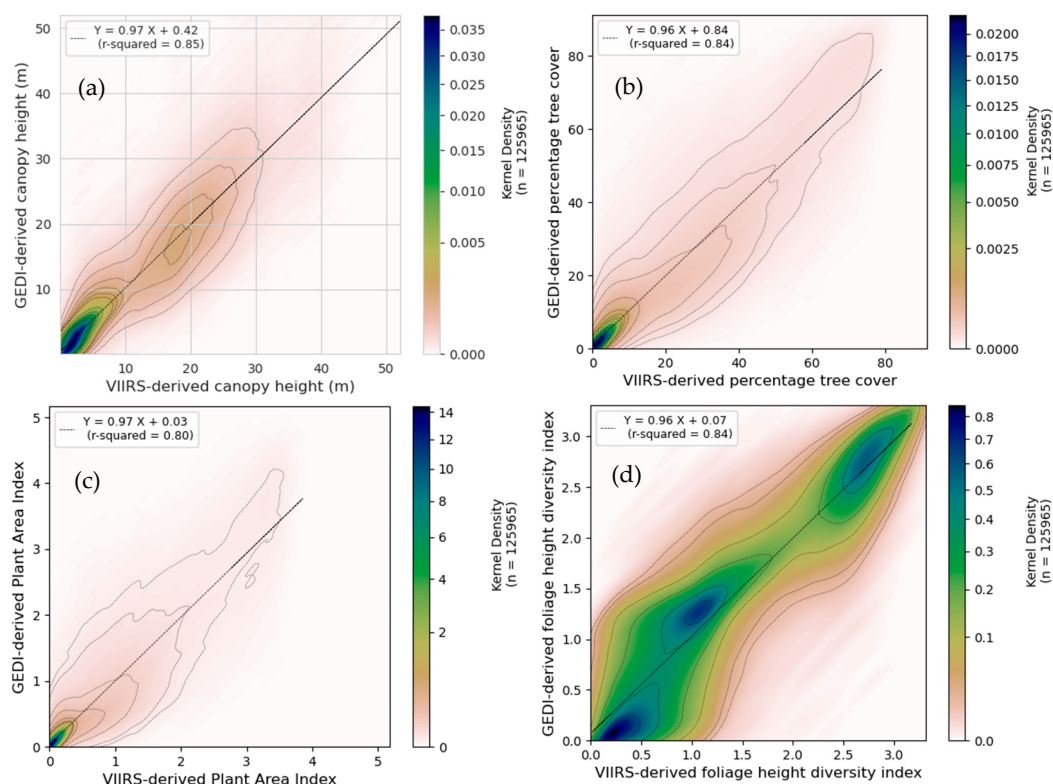

Figure S2. Comparisons between the 2020 VIIRS-derived and 2020 GEDI-derived: (a) canopy height; (b) canopy fraction cover; (c) plant area index; and (d) foliage height diversity.

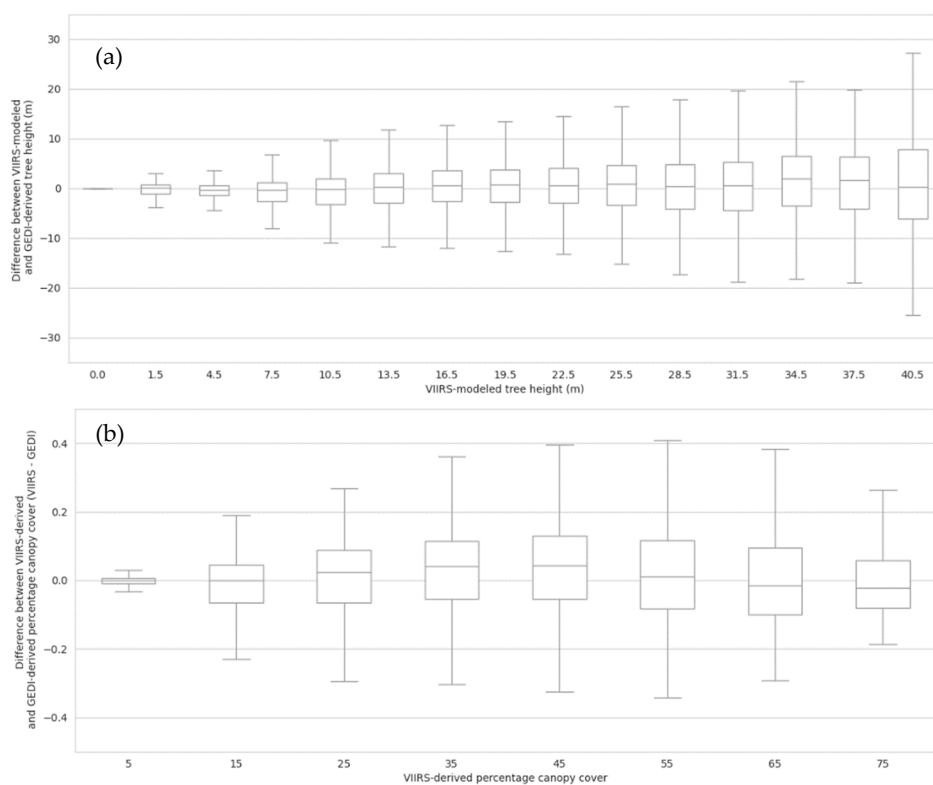

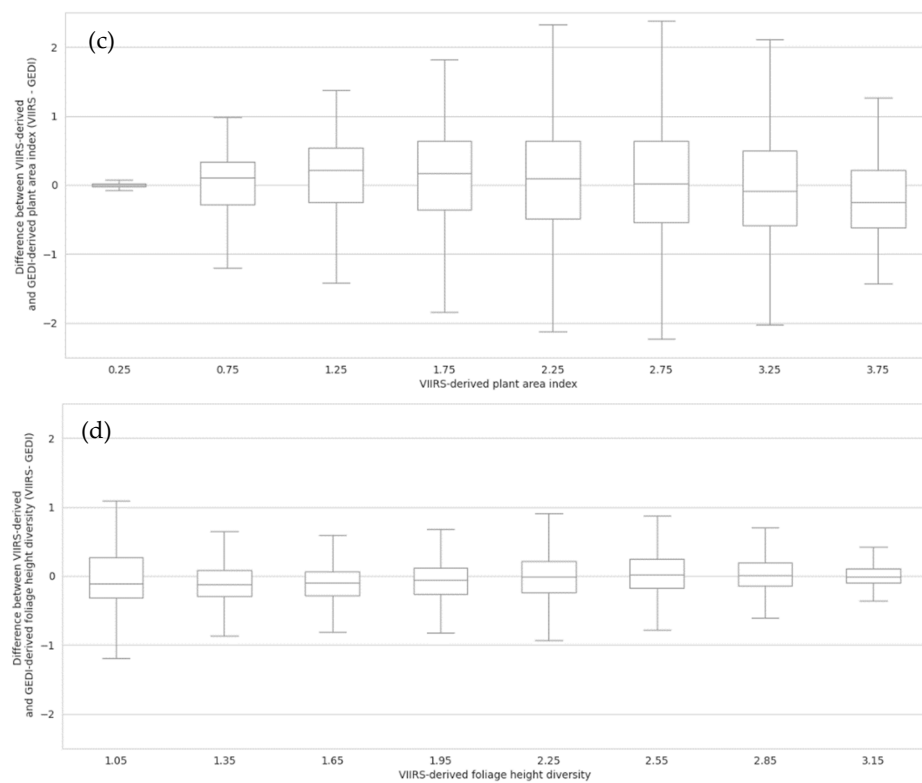

Figure S3. Distribution of differences between the 2020 (a) VIIRS and GEDI-derived canopy height; (b) VIIRS and GEDI-derived fraction cover, (c) VIIRS and GEDI-derived Plant Area Index; and (d) VIIRS and GEDI-derived foliage height diversity.
